# Supplementary material
Source: publisher site journal article supplement (https://thieme-connect.com/media/10.1055-s-00035024/201106/supmat/10-1160-th11-04-0229-supp.pdf)
Supplement: Supplementary file 1 [file 10-1160-th11-04-0229-supp.pdf]

# Supplementary Material to Xu et al. “Involvement of IRAKs and TRAFs in anti- $\beta_2$ GPI/ $\beta_2$ GPI-induced tissue factor expression in THP-1 cells” (Thromb Haemost 2011; 106.5)

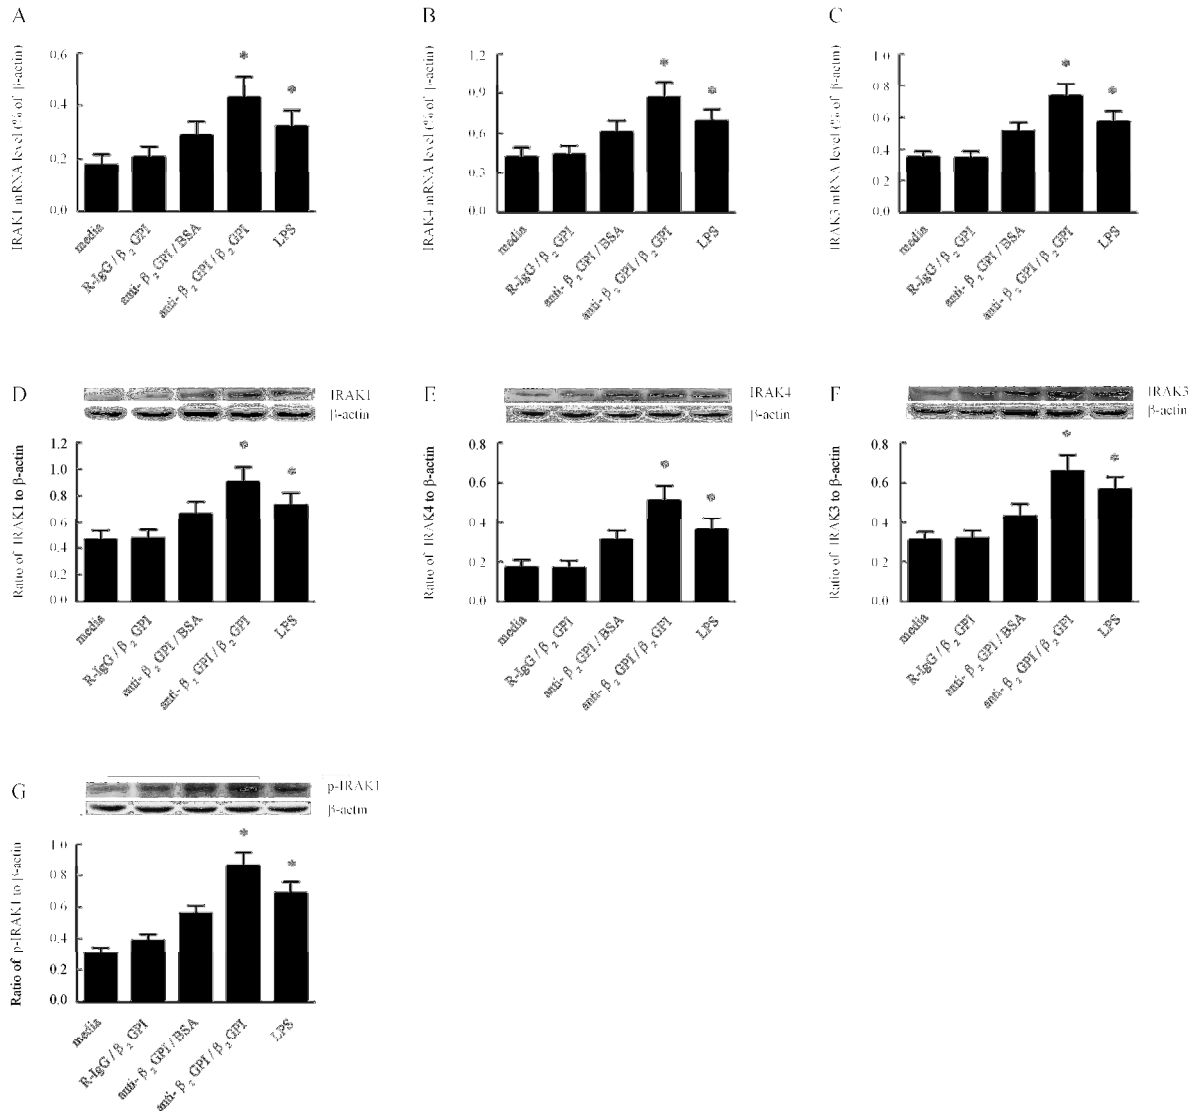

**Supplemental Figure 1: The stimulatory effects of anti- $\beta_2$ GPI/ $\beta_2$ GPI on IRAKs**

**expression at mRNA and protein levels in THP-1 cells** The THP-1 cells ( $2 \times 10^6$ ) were treated with anti- $\beta_2$ GPI (10  $\mu$ g/ml) /  $\beta_2$ GPI (100  $\mu$ g/ml) complex, isotype control rabbit immunoglobulin G ( R-IgG) (10  $\mu$ g/ml) /  $\beta_2$ GPI (100  $\mu$ g/ml), control of anti- $\beta_2$ GPI (10  $\mu$ g/ml) / bovine serum albumin (BSA, 100 $\mu$ g/ml), LPS (500 ng/ml) for different times. Total RNAs were extracted and mRNA levels of IRAK1 (A), IRAK4 (B) and IRAK3 (C) were measured by real-time quantitative PCR. Cells were lysed and proteins were subjected to

Western blot using IRAK1 (D), p-IRAK1 (G), IRAK4 (E), IRAK3 (F) and  $\beta$ -actin antibodies, respectively. Shown are representative blot and pooled data from three independent experiments. \*  $p < 0.05$  vs control of media.

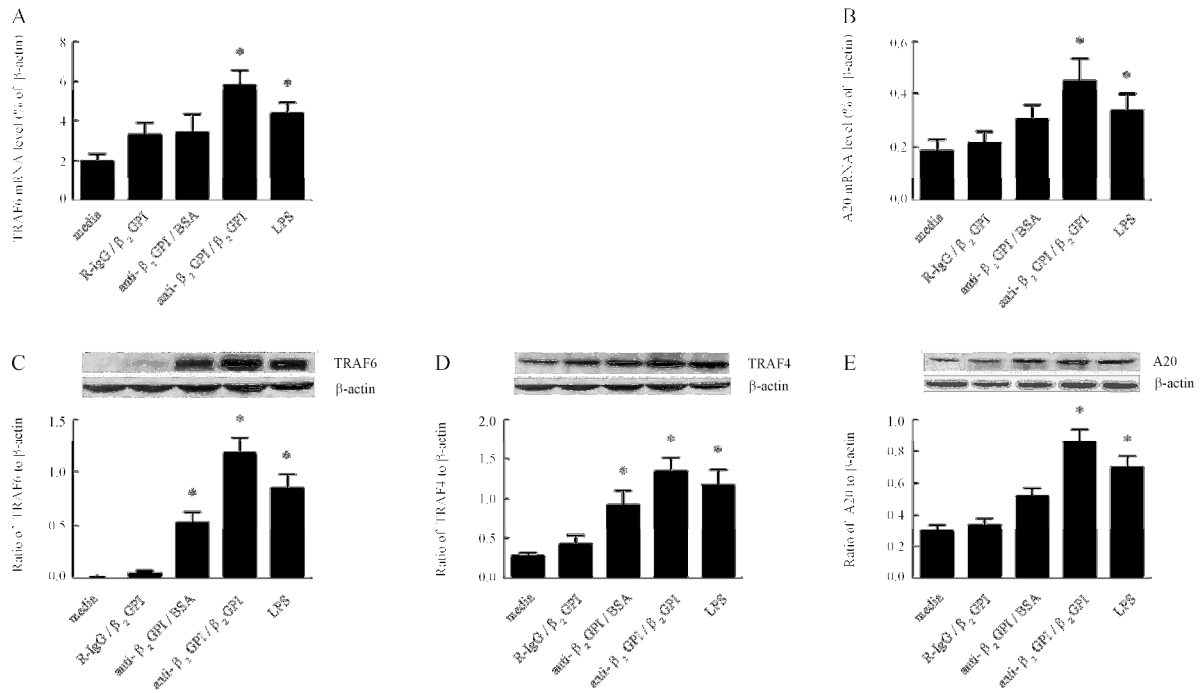

### Supplemental Figure 2: The stimulatory effects of anti- $\beta_2$ GPI/ $\beta_2$ GPI on TRAFs

**expression at mRNA and protein levels in THP-1 cells** The THP-1 cells ( $2 \times 10^6$ ) were treated with anti- $\beta_2$ GPI (10  $\mu$ g/ml) /  $\beta_2$ GPI (100  $\mu$ g/ml) complex, isotype control rabbit immunoglobulin G (R-IgG) (10  $\mu$ g/ml) /  $\beta_2$ GPI (100  $\mu$ g/ml), control of anti- $\beta_2$ GPI (10  $\mu$ g/ml) / bovine serum albumin (BSA, 100 $\mu$ g/ml), LPS (500 ng/ml) for different times. Total RNAs were extracted and used to detect mRNA levels of TRAF6 (A) and zinc finger protein A20 (B) by real-time quantitative PCR. Cells were lysed and proteins were subjected to Western blot using TRAF6 (C), TRAF4 (D), A20 (E) and  $\beta$ -actin antibodies, respectively. Shown are representative blot and pooled data from three independent experiments. \*  $p < 0.05$  vs control of media.

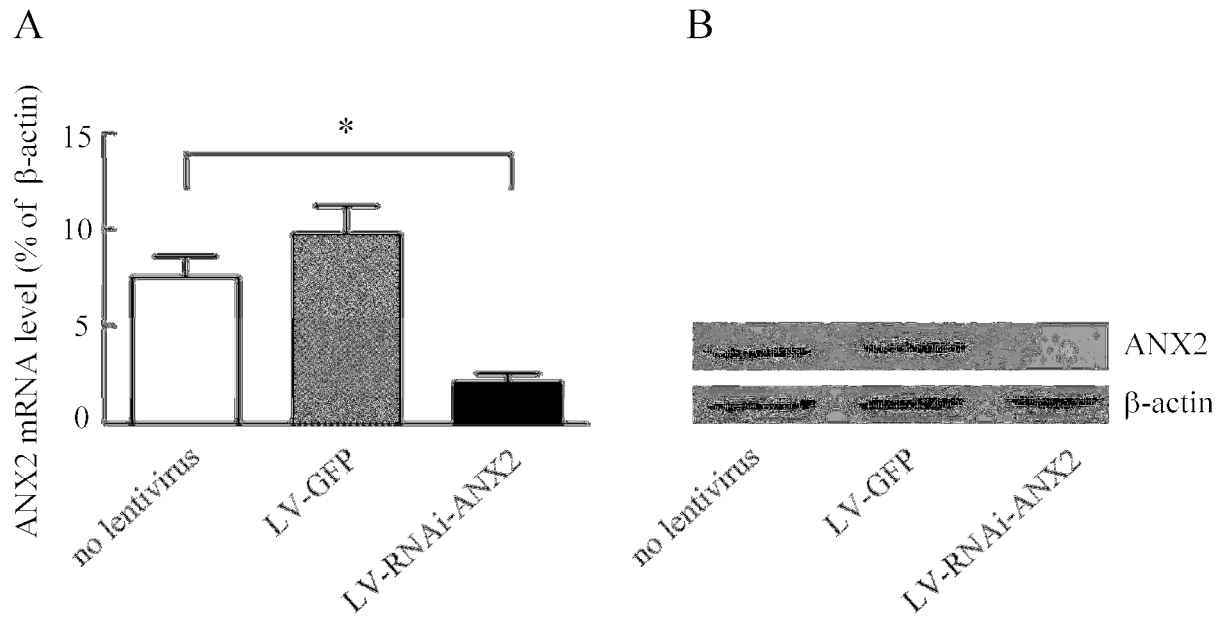

**Supplemental Figure 3: ANX2 mRNA (A) and protein (B) levels in lentivirus-infected THP-1 cells** The empty lentivirus (LV-GFP) and ANX2 siRNA (LV-RNAi-ANX2) were transferred into target THP-1 cells at MOI equal to 100 with ENi.S and 5  $\mu$ g / mL polybrene. After 72 h, the ANX2 mRNA (A) and its protein (B) levels on the cells were detected by real time quantitative PCR or Western blot. \*  $p < 0.01$  vs no lentivirus cells. Data shown with three separate experiments.

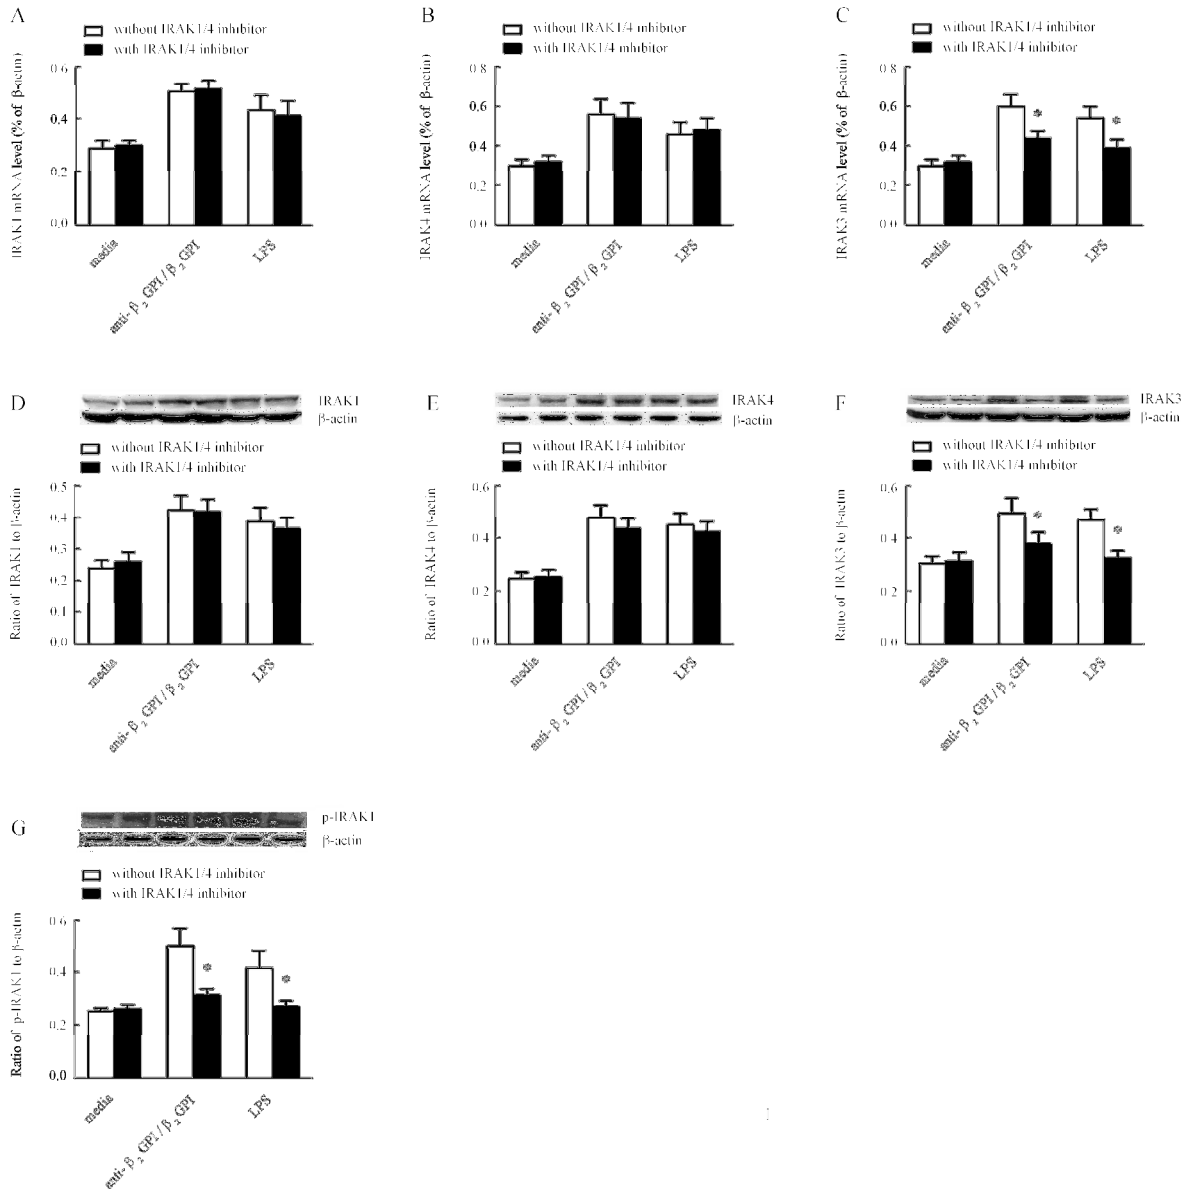

**Supplemental Figure 4: The effects of IRAK1/4 inhibitor on IRAKs expression in THP-**

**1 cells** THP-1 cells ( $2 \times 10^6$ ) were pre-incubation with of IRAK1/4 inhibitor ( $5 \mu\text{M}$ ) for 2 h and then stimulated by anti- $\beta_2$ GPI ( $10 \mu\text{g/mL}$ )/ $\beta_2$ GPI ( $100 \mu\text{g/mL}$ ) complex or LPS ( $500 \text{ ng/ml}$ ) for additional different times. Total RNAs were extracted and mRNA levels of IRAK1 (A), IRAK4 (B) and IRAK3 (C) were measured by real-time quantitative PCR. Cells were lysed and proteins were subjected to Western blot using IRAK1 (D), p-IRAK1 (G), IRAK4 (E), IRAK3 (F) and  $\beta$ -actin antibodies, respectively. Shown are representative blot and pooled data from three independent experiments. \*  $p < 0.05$  vs control of media.
